# Supplementary material for: Microbial Synergy: Fungal Laccase-Mediated Optimized Bio-detoxification and Extremophile-Driven Bio-devulcanization of Ground Tire Rubber for Sustainable Recycling
Source: Research Square preprint supplement (doi:10.21203/rs.3.rs-8637749/v1), 2026-02-12
Supplement: Supplementary file 1 [file 1d45fbfc452e9194c1572c62.docx]

**“Microbial Synergy: Fungal Laccase-Mediated Optimized Bio-detoxification and Extremophile-Driven Bio-devulcanization of Ground Tire Rubber for Sustainable Recycling”**

Journal name: Biodegradation

Harmen Shaha, d*, FaridahYusofa,b, Md Zahangir Alama,c

*a Department of Chemical Engineering and Sustainability, International Islamic University Malaysia (IIUM), P.O. Box 10, 50728, Kuala Lumpur, Malaysia.*

*b Bioprocess and Molecular Engineering Research Unit (BPMERU), IIUM, P.O. Box 10, 50728, Kuala Lumpur, Malaysia.*

*c Bioenvironmental Engineering Research Center (BERC), IIUM, P.O. Box 10, 50728, Kuala Lumpur, Malaysia.*

*d Vidya Vihar Institute of Technology, BIADA, Maranga, Purnea, PIN – 854301, India.*

* Corresponding author

*Email address:* [harmenshah1@gmail.com](mailto:harmenshah1@gmail.com)

**SUPPLEMENTARY MATERIAL**

**Figure S1**


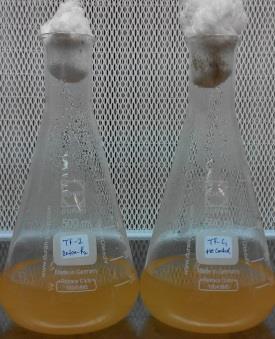


**Figure S1.** Showing modified Silverman medium used for the cultivation of A. ferrooxidans to carry out bio-devulcanization of GTR.
