# Supplementary material for: Microbial Synergy: Fungal Laccase-Mediated Optimized Bio-detoxification and Extremophile-Driven Bio-devulcanization of Ground Tire Rubber for Sustainable Recycling
Source: Research Square preprint supplement (doi:10.21203/rs.3.rs-8637749/v1), 2026-02-12
Supplement: Supplementary file 2 [file 3906c171fa92fff386b1dcb6.docx]

**“Microbial Synergy: Fungal Laccase-Mediated Optimized Bio-detoxification and Extremophile-Driven Bio-devulcanization of Ground Tire Rubber for Sustainable Recycling”**

Journal name: Biodegradation

Harmen Shaha, d*, FaridahYusofa,b, Md Zahangir Alama,c

*a Department of Chemical Engineering and Sustainability, International Islamic University Malaysia (IIUM), P.O. Box 10, 50728, Kuala Lumpur, Malaysia.*

*b Bioprocess and Molecular Engineering Research Unit (BPMERU), IIUM, P.O. Box 10, 50728, Kuala Lumpur, Malaysia.*

*c Bioenvironmental Engineering Research Center (BERC), IIUM, P.O. Box 10, 50728, Kuala Lumpur, Malaysia.*

*d Vidya Vihar Institute of Technology, BIADA, Maranga, Purnea, PIN – 854301, India.*

* Corresponding author

*Email address:* [harmenshah1@gmail.com](mailto:harmenshah1@gmail.com)

### SUPPLEMENTARY MATERIAL

### Equation S1: Laccase assay

It was performed by adopting the method of Ride (1980) as explained in section 2.6.

Laccase activity was calculated as follows:

*Units / ml enzyme* = (1)

Where;

DF = Dilution factor

0.001 = the change in the ∆A530 / min per unit of laccase at pH 6.6 at 30ºC in a 3 ml of

Reaction mixture

0.5 = Volume (mL, milliliter) of enzyme sample

Units / mg solid = (2)
