# Supplementary material for: Microbial Synergy: Fungal Laccase-Mediated Optimized Bio-detoxification and Extremophile-Driven Bio-devulcanization of Ground Tire Rubber for Sustainable Recycling
Source: Research Square preprint supplement (doi:10.21203/rs.3.rs-8637749/v1), 2026-02-12
Supplement: Supplementary file 3 [file 46a221d7dcec1cd8c57b49b7.docx]

**“Microbial Synergy: Fungal Laccase-Mediated Optimized Bio-detoxification and Extremophile-Driven Bio-devulcanization of Ground Tire Rubber for Sustainable Recycling”**

Journal name: Biodegradation

Harmen Shaha, d*, FaridahYusofa,b, Md Zahangir Alama,c

*a Department of Chemical Engineering and Sustainability, International Islamic University Malaysia (IIUM), P.O. Box 10, 50728, Kuala Lumpur, Malaysia.*

*b Bioprocess and Molecular Engineering Research Unit (BPMERU), IIUM, P.O. Box 10, 50728, Kuala Lumpur, Malaysia.*

*c Bioenvironmental Engineering Research Center (BERC), IIUM, P.O. Box 10, 50728, Kuala Lumpur, Malaysia.*

*d Vidya Vihar Institute of Technology, BIADA, Maranga, Purnea, PIN – 854301, India.*

* Corresponding author

*Email address:* [harmenshah1@gmail.com](mailto:harmenshah1@gmail.com)

**SUPPLEMENTARY MATERIAL**

**Table S2**

**NDT-GTR**

| **Time/Days** | **NDT-GTR1** | **NDT-GTR2** | **NDT-GTR3** | **(Average)** | **Std. Dev.** |
| --- | --- | --- | --- | --- | --- |
| 0 | 0.023 | 0.018 | 0.029 | 0.023 | 0.0055 |
| 1 | 0.377 | 0.376 | 0.372 | 0.375 | 0.0022 |
| 2 | 0.1 | 0.101 | 0.102 | 0.101 | 0.0008 |
| 3 | 0.3 | 0.297 | 0.301 | 0.299 | 0.0017 |
| 4 | 0.287 | 0.284 | 0.289 | 0.287 | 0.0021 |
| 5 | 0.281 | 0.283 | 0.279 | 0.281 | 0.0016 |
| 6 | 0.273 | 0.27 | 0.271 | 0.271 | 0.0013 |
| 7 | 0.259 | 0.253 | 0.257 | 0.256 | 0.0025 |

**BDT-GTR**

| **Time/Days** | **BDT-GTR1** | **BDT-GTR2** | **BDT-GTR3** | **(Average)** | **Std. Dev.** |
| --- | --- | --- | --- | --- | --- |
| 0 | 0.023 | 0.018 | 0.029 | 0.023 | 0.006 |
| 1 | 0.569 | 0.573 | 0.572 | 0.571 | 0.0021 |
| 2 | 0.592 | 0.591 | 0.594 | 0.592 | 0.0015 |
| 3 | 0.778 | 0.779 | 0.78 | 0.779 | 0.001 |
| 4 | 0.736 | 0.733 | 0.737 | 0.735 | 0.0021 |
| 5 | 0.731 | 0.73 | 0.696 | 0.719 | 0.0199 |
| 6 | 0.724 | 0.72 | 0.73 | 0.725 | 0.005 |
| 7 | 0.688 | 0.692 | 0.69 | 0.690 | 0.002 |
