# Supplementary material for: Microbial Synergy: Fungal Laccase-Mediated Optimized Bio-detoxification and Extremophile-Driven Bio-devulcanization of Ground Tire Rubber for Sustainable Recycling
Source: Research Square preprint supplement (doi:10.21203/rs.3.rs-8637749/v1), 2026-02-12
Supplement: Supplementary file 4 [file 71130ecb930fe4584638d756.docx]

**“Microbial Synergy: Fungal Laccase-Mediated Optimized Bio-detoxification and Extremophile-Driven Bio-devulcanization of Ground Tire Rubber for Sustainable Recycling”**

Journal name: Biodegradation

Harmen Shaha, d*, FaridahYusofa,b, Md Zahangir Alama,c

*a Department of Chemical Engineering and Sustainability, International Islamic University Malaysia (IIUM), P.O. Box 10, 50728, Kuala Lumpur, Malaysia.*

*b Bioprocess and Molecular Engineering Research Unit (BPMERU), IIUM, P.O. Box 10, 50728, Kuala Lumpur, Malaysia.*

*c Bioenvironmental Engineering Research Center (BERC), IIUM, P.O. Box 10, 50728, Kuala Lumpur, Malaysia.*

*d Vidya Vihar Institute of Technology, BIADA, Maranga, Purnea, PIN – 854301, India.*

* Corresponding author

*Email address:* [harmenshah1@gmail.com](mailto:harmenshah1@gmail.com)

**SUPPLEMENTARY MATERIAL**

**Figure S2.** GTR particles entrapped in mycelia of *R. bicolor*


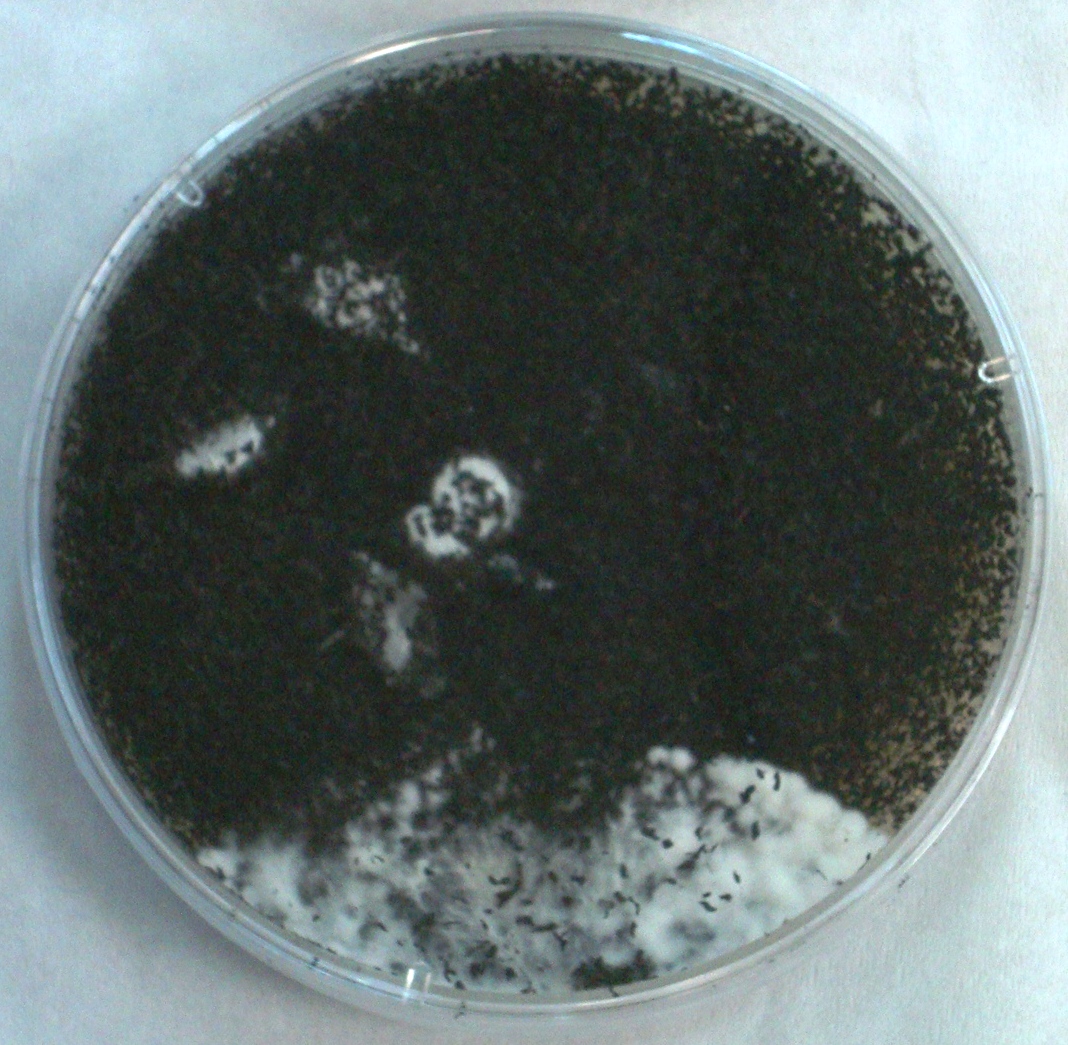


**Figure S2** *R. bicolor* growing on Malt-extract agar plate in the presence of GTR crumb. The figure clearly shows the expanding mycelial mat of *R. bicolor* entangling GTR particles within irrespective of its toxicity.
