# Supplementary material for: Microbial Synergy: Fungal Laccase-Mediated Optimized Bio-detoxification and Extremophile-Driven Bio-devulcanization of Ground Tire Rubber for Sustainable Recycling
Source: Research Square preprint supplement (doi:10.21203/rs.3.rs-8637749/v1), 2026-02-12
Supplement: Supplementary file 5 [file af2cbd2d080a3c4f940c0eca.docx]

**“Microbial Synergy: Fungal Laccase-Mediated Optimized Bio-detoxification and Extremophile-Driven Bio-devulcanization of Ground Tire Rubber for Sustainable Recycling”**

Journal name: Biodegradation

Harmen Shaha, d*, FaridahYusofa,b, Md Zahangir Alama,c

*a Department of Chemical Engineering and Sustainability, International Islamic University Malaysia (IIUM), P.O. Box 10, 50728, Kuala Lumpur, Malaysia.*

*b Bioprocess and Molecular Engineering Research Unit (BPMERU), IIUM, P.O. Box 10, 50728, Kuala Lumpur, Malaysia.*

*c Bioenvironmental Engineering Research Center (BERC), IIUM, P.O. Box 10, 50728, Kuala Lumpur, Malaysia.*

*d Vidya Vihar Institute of Technology, BIADA, Maranga, Purnea, PIN – 854301, India.*

* Corresponding author

*Email address:* [harmenshah1@gmail.com](mailto:harmenshah1@gmail.com)

**SUPPLEMENTARY MATERIAL**

**Table S1.** Maximum absorption maxima (λmax) at 277 nm.

| **Wavelength (nm)** | **Bio-detoxified GTR (Optimized)** | **Bio-detoxified GTR (Unoptimized - Positive control)** | **Buffered crude laccase (negative control)** |
| --- | --- | --- | --- |
| 210 | 3.3542 | 1.2906 | 0.4241 |
| 211 | 3.3405 | 1.2123 | 0.4074 |
| 212 | 3.3063 | 1.1552 | 0.3913 |
| 213 | 3.3513 | 1.1071 | 0.3764 |
| 214 | 3.3331 | 1.0656 | 0.3618 |
| 215 | 3.3738 | 1.0318 | 0.3468 |
| 216 | 3.3424 | 1.0032 | 0.3321 |
| 217 | 3.3724 | 0.9796 | 0.3176 |
| 218 | 3.4841 | 0.9587 | 0.3028 |
| 219 | 3.3592 | 0.9393 | 0.2888 |
| 220 | 3.369 | 0.9202 | 0.2739 |
| 221 | 3.3764 | 0.902 | 0.26 |
| 222 | 3.509 | 0.8855 | 0.2468 |
| 223 | 3.4288 | 0.87 | 0.2352 |
| 224 | 3.367 | 0.8545 | 0.2239 |
| 225 | 3.383 | 0.838 | 0.2141 |
| 226 | 3.285 | 0.8186 | 0.2048 |
| 227 | 3.1982 | 0.7971 | 0.1965 |
| 228 | 3.066 | 0.7812 | 0.1911 |
| 229 | 2.9462 | 0.7698 | 0.1875 |
| 230 | 2.7827 | 0.7559 | 0.1838 |
| 231 | 2.6094 | 0.7373 | 0.1793 |
| 232 | 2.425 | 0.7141 | 0.1751 |
| 233 | 2.2854 | 0.6933 | 0.1716 |
| 234 | 2.166 | 0.6758 | 0.1688 |
| 235 | 2.0649 | 0.6626 | 0.1668 |
| 236 | 1.9734 | 0.6515 | 0.1649 |
| 237 | 1.8885 | 0.6434 | 0.1631 |
| 238 | 1.8144 | 0.6376 | 0.1613 |
| 239 | 1.739 | 0.6331 | 0.1593 |
| 240 | 1.6708 | 0.6313 | 0.1569 |
| 241 | 1.6052 | 0.6313 | 0.1549 |
| 242 | 1.5496 | 0.6337 | 0.1533 |
| 243 | 1.5099 | 0.6372 | 0.1522 |
| 244 | 1.4736 | 0.6423 | 0.1512 |
| 245 | 1.4287 | 0.6498 | 0.15 |
| 246 | 1.3764 | 0.6615 | 0.1486 |
| 247 | 1.3395 | 0.6734 | 0.1475 |
| 248 | 1.3189 | 0.6831 | 0.1468 |
| 249 | 1.2955 | 0.6961 | 0.146 |
| 250 | 1.2755 | 0.7094 | 0.1449 |
| 251 | 1.2588 | 0.7245 | 0.1435 |
| 252 | 1.2474 | 0.7416 | 0.1423 |
| 253 | 1.2428 | 0.7588 | 0.1412 |
| 254 | 1.2443 | 0.775 | 0.1399 |
| 255 | 1.2501 | 0.7901 | 0.1384 |
| 256 | 1.2583 | 0.8019 | 0.1373 |
| 257 | 1.2712 | 0.8149 | 0.1359 |
| 258 | 1.2886 | 0.829 | 0.1345 |
| 259 | 1.3066 | 0.8425 | 0.1332 |
| 260 | 1.3206 | 0.8514 | 0.1322 |
| 261 | 1.3342 | 0.8583 | 0.1314 |
| 262 | 1.3522 | 0.865 | 0.1301 |
| 263 | 1.3772 | 0.8728 | 0.1285 |
| 264 | 1.4061 | 0.8807 | 0.127 |
| 265 | 1.4337 | 0.8874 | 0.1253 |
| 266 | 1.46 | 0.8933 | 0.1235 |
| 267 | 1.4876 | 0.8988 | 0.1219 |
| 268 | 1.5149 | 0.9036 | 0.1202 |
| 269 | 1.542 | 0.9069 | 0.1185 |
| 270 | 1.5739 | 0.9086 | 0.1164 |
| 271 | 1.5987 | 0.9087 | 0.1145 |
| 272 | 1.6177 | 0.9081 | 0.1131 |
| 273 | 1.635 | 0.9053 | 0.1117 |
| 274 | 1.6526 | 0.8998 | 0.1101 |
| 275 | 1.6638 | 0.8912 | 0.1081 |
| 276 | 1.6719 | 0.8822 | 0.1066 |
| **277** | 1.6724 | 0.8707 | 0.1053 |
| 278 | 1.6689 | 0.8576 | 0.1039 |
| 279 | 1.6575 | 0.8412 | 0.1025 |
| 280 | 1.6439 | 0.8244 | 0.1013 |
| 281 | 1.6264 | 0.8092 | 0.1002 |
| 282 | 1.6088 | 0.7946 | 0.0992 |
| 283 | 1.5873 | 0.7796 | 0.0983 |
| 284 | 1.5631 | 0.7624 | 0.0973 |
| 285 | 1.5356 | 0.7439 | 0.0965 |
| 286 | 1.5065 | 0.7244 | 0.0954 |
| 287 | 1.4774 | 0.7031 | 0.0946 |
| 288 | 1.4441 | 0.6798 | 0.0936 |
| 289 | 1.4089 | 0.6566 | 0.0925 |
| 290 | 1.3719 | 0.632 | 0.0913 |
| 291 | 1.3345 | 0.6079 | 0.0902 |
| 292 | 1.2977 | 0.5845 | 0.0892 |
| 293 | 1.2599 | 0.56 | 0.0881 |
| 294 | 1.222 | 0.533 | 0.0869 |
| 295 | 1.1893 | 0.5075 | 0.0858 |
| 296 | 1.1592 | 0.4824 | 0.0847 |
| 297 | 1.1356 | 0.46 | 0.0835 |
| 298 | 1.1113 | 0.4371 | 0.0827 |
| 299 | 1.0896 | 0.4143 | 0.0817 |
| 300 | 1.0697 | 0.3914 | 0.0806 |
| 301 | 1.0518 | 0.3706 | 0.0796 |
| 302 | 1.0371 | 0.3517 | 0.0787 |
| 303 | 1.0226 | 0.332 | 0.078 |
| 304 | 1.0095 | 0.3151 | 0.0771 |
| 305 | 0.9984 | 0.2996 | 0.0764 |
| 306 | 0.9886 | 0.286 | 0.0757 |
| 307 | 0.9801 | 0.2734 | 0.0751 |
| 308 | 0.9726 | 0.2619 | 0.0743 |
| 309 | 0.9649 | 0.2519 | 0.0739 |
| 310 | 0.9591 | 0.2429 | 0.0733 |
| 311 | 0.9529 | 0.2338 | 0.0726 |
| 312 | 0.9468 | 0.2252 | 0.072 |
| 313 | 0.9412 | 0.2168 | 0.0714 |
| 314 | 0.9356 | 0.2091 | 0.0708 |
| 315 | 0.9308 | 0.2019 | 0.0702 |
| 316 | 0.9259 | 0.1961 | 0.0698 |
| 317 | 0.9203 | 0.1896 | 0.0692 |
| 318 | 0.9129 | 0.1831 | 0.0685 |
| 319 | 0.9055 | 0.1772 | 0.0677 |
| 320 | 0.8979 | 0.1723 | 0.0672 |
| 321 | 0.8884 | 0.1675 | 0.0667 |
| 322 | 0.8756 | 0.1622 | 0.0661 |
| 323 | 0.8632 | 0.1584 | 0.0654 |
| 324 | 0.8514 | 0.1547 | 0.065 |
| 325 | 0.837 | 0.1522 | 0.0645 |
| 326 | 0.8194 | 0.1485 | 0.064 |
| 327 | 0.8018 | 0.1461 | 0.0635 |
| 328 | 0.7846 | 0.1435 | 0.063 |
| 329 | 0.7663 | 0.1412 | 0.0627 |
| 330 | 0.7486 | 0.1395 | 0.062 |
| 331 | 0.7305 | 0.1374 | 0.0617 |
| 332 | 0.7119 | 0.1356 | 0.0611 |
| 333 | 0.6938 | 0.1344 | 0.0609 |
| 334 | 0.6768 | 0.1329 | 0.0605 |
| 335 | 0.6588 | 0.1311 | 0.0601 |
| 336 | 0.6402 | 0.1293 | 0.0598 |
| 337 | 0.6209 | 0.1272 | 0.0594 |
| 338 | 0.5983 | 0.1248 | 0.0589 |
| 339 | 0.5773 | 0.123 | 0.0584 |
| 340 | 0.5578 | 0.1214 | 0.0579 |
| 341 | 0.5368 | 0.12 | 0.0576 |
| 342 | 0.5127 | 0.1184 | 0.0572 |
| 343 | 0.4881 | 0.116 | 0.0566 |
| 344 | 0.4629 | 0.1148 | 0.0563 |
| 345 | 0.4415 | 0.1135 | 0.0557 |
| 346 | 0.4212 | 0.1122 | 0.0552 |
| 347 | 0.4017 | 0.1109 | 0.0548 |
| 348 | 0.3755 | 0.1093 | 0.0542 |
| 349 | 0.3507 | 0.1082 | 0.0537 |
| 350 | 0.333 | 0.1065 | 0.0535 |
| 351 | 0.3169 | 0.1051 | 0.0528 |
| 352 | 0.3003 | 0.1043 | 0.0523 |
| 353 | 0.2835 | 0.1034 | 0.0519 |
| 354 | 0.268 | 0.1017 | 0.0514 |
| 355 | 0.2562 | 0.1014 | 0.0512 |
| 356 | 0.2437 | 0.1002 | 0.0508 |
| 357 | 0.2343 | 0.0999 | 0.0504 |
| 358 | 0.225 | 0.0983 | 0.05 |
| 359 | 0.2146 | 0.0976 | 0.0497 |
| 360 | 0.2047 | 0.0969 | 0.0493 |
| 361 | 0.1951 | 0.0959 | 0.0489 |
| 362 | 0.1878 | 0.0953 | 0.0486 |
| 363 | 0.1811 | 0.0945 | 0.0482 |
| 364 | 0.173 | 0.0942 | 0.0479 |
| 365 | 0.1651 | 0.093 | 0.0475 |
| 366 | 0.1582 | 0.0926 | 0.0472 |
| 367 | 0.1516 | 0.0913 | 0.0468 |
| 368 | 0.146 | 0.0908 | 0.0463 |
| 369 | 0.1417 | 0.0892 | 0.0459 |
| 370 | 0.1358 | 0.0884 | 0.0456 |
| 371 | 0.1317 | 0.0877 | 0.0454 |
| 372 | 0.129 | 0.0874 | 0.045 |
| 373 | 0.125 | 0.0866 | 0.0445 |
| 374 | 0.1227 | 0.086 | 0.0442 |
| 375 | 0.1206 | 0.0856 | 0.0438 |
| 376 | 0.119 | 0.0844 | 0.0436 |
| 377 | 0.1173 | 0.0841 | 0.0434 |
| 378 | 0.1162 | 0.0827 | 0.0433 |
| 379 | 0.1148 | 0.0824 | 0.0429 |
| 380 | 0.1146 | 0.0823 | 0.0427 |
| 381 | 0.1129 | 0.0811 | 0.0425 |
| 382 | 0.1124 | 0.0802 | 0.0422 |
| 383 | 0.1112 | 0.0796 | 0.042 |
| 384 | 0.1111 | 0.0799 | 0.0418 |
| 385 | 0.1104 | 0.0794 | 0.0417 |
| 386 | 0.1102 | 0.0788 | 0.0412 |
| 387 | 0.11 | 0.0786 | 0.0413 |
| 388 | 0.1095 | 0.0774 | 0.041 |
| 389 | 0.1093 | 0.0777 | 0.0409 |
| 390 | 0.1089 | 0.0767 | 0.0406 |
| 391 | 0.1082 | 0.0758 | 0.0402 |
| 392 | 0.1085 | 0.0754 | 0.0401 |
| 393 | 0.1081 | 0.0757 | 0.04 |
| 394 | 0.1075 | 0.0746 | 0.0397 |
| 395 | 0.1076 | 0.0747 | 0.0395 |
| 396 | 0.1073 | 0.0732 | 0.0394 |
| 397 | 0.1073 | 0.0737 | 0.0392 |
| 398 | 0.1071 | 0.0729 | 0.0391 |
| 399 | 0.1068 | 0.0723 | 0.0388 |
| 400 | 0.1067 | 0.0718 | 0.0386 |
| 401 | 0.1057 | 0.0704 | 0.0385 |
| 402 | 0.1052 | 0.0699 | 0.0382 |
| 403 | 0.1058 | 0.0699 | 0.0381 |
| 404 | 0.1047 | 0.0694 | 0.0382 |
| 405 | 0.104 | 0.069 | 0.038 |
| 406 | 0.1032 | 0.0686 | 0.0378 |
| 407 | 0.1026 | 0.0677 | 0.0376 |
| 408 | 0.1011 | 0.0677 | 0.0376 |
| 409 | 0.1019 | 0.0674 | 0.0374 |
| 410 | 0.0997 | 0.0667 | 0.0375 |
